# Supplementary material for: Prognostic Value of Serum Exosomal AHCY Expression in Hepatitis B-Induced Liver Cirrhosis
Source: Front Med (Lausanne). 2021 Nov 8;8:777452. doi: 10.3389/fmed.2021.777452 (PMC8606640; doi:10.3389/fmed.2021.777452)
Supplement: Supplementary file 1 [file Table_1.XLSX]

## Sheet: Data
Group	AHCY
HBV-LC	156.54
HBV-LC	231.81
HBV-LC	153.75
HBV-LC	162.51
HBV-LC	146.72
HBV-LC	107.55
HBV-LC	65.6
HBV-LC	363.78
HBV-LC	163.06
HBV-LC	173.42
HBV-LC	324.92
HBV-LC	249.8
HBV-LC	281.4
HBV-LC	279.76
HBV-LC	263.58
HBV-LC	349.09
HBV-LC	289.94
HBV-LC	299.77
HBV-LC	58.11
HBV-LC	178.81
HBV-LC	226.5
HBV-LC	293.06
HBV-LC	236.91
HBV-LC	241.66
HBV-LC	209.76
HBV-LC	165.34
HBV-LC	231.98
HBV-LC	220.55
HBV-LC	313.76
HBV-LC	342.6
HBV-LC	271.11
HBV-LC	311.32
HBV-LC	309.13
HBV-LC	339.98
HBV-LC	308.24
HBV-LC	312.38
HBV-LC	234.31
HBV-LC	331.25
HBV-LC	230.2
HBV-LC	332.16
HBV-LC	247.2
HBV-LC	319.34
HBV-LC	312.14
HBV-LC	318.64
HBV-LC	212.15
HBV-LC	315.99
HBV-LC	286.09
HBV-LC	192.53
HBV-LC	239.83
HBV-LC	364.26
HBV-LC	202.3
HBV-LC	353.46
HBV-LC	353.78
HBV-LC	286.81
HBV-LC	307.06
HBV-LC	330.64
HBV-LC	320.46
HBV-LC	348.29
HBV-LC	237.76
HBV-LC	351.78
HBV-LC	182.79
HBV-LC	352.33
HBV-LC	358.39
HBV-LC	344.56
HBV-LC	369.74
HBV-LC	536.74
HBV-LC	379.06
HBV-LC	370.98
HBV-LC	394.66
HBV-LC	419.89
HBV-LC	683.55
HBV-LC	560.01
HBV-LC	397.15
HBV-LC	428.2
HBV-LC	376.62
HBV-LC	376.92
HBV-LC	376.93
HBV-LC	409.91
HBV-LC	425.8
HBV-LC	462.4
HBV-LC	392.33
HBV-LC	411.05
HBV-LC	499.8
HBV-LC	372.89
HBV-LC	503.28
HBV-LC	399.21
HBV-LC	382.34
HBV-LC	400.26
HBV-LC	511.19
HBV-LC	557.35
HBV-LC	452.26
HBV-LC	623.51
HBV-LC	445.05
HBV-LC	397.4
HBV-LC	457.19
HBV-LC	520.25
HBV-LC	406.93
HBV-LC	414.97
HBV-LC	593.52
HBV-LC	407.48
HBV-LC	392.7
HBV-LC	396.84
HBV-LC	446.43
HBV-LC	527.8
HBV-LC	474.09
HBV-LC	405.17
HBV-LC	477.44
HBV-LC	376.11
HBV-LC	435.18
HBV-LC	460.33
HBV-LC	526.21
HBV-LC	539.92
HBV-LC	557.32
HBV-LC	580.8
HBV-LC	376.14
HBV-LC	401.27
HBV-LC	386.63
HBV-LC	426.13
HBV-LC	440.32
HBV-LC	372.44
HBV-LC	423.97
HBV-LC	477.16
HBV-LC	398.94
HBV-LC	455.47
HBV-LC	413.11
HBV-LC	387.12
HBV-LC	515.73
HBV-LC	463.01
HBV-LC	617.12
HBV-LC	449.62
HBV-LC	491.02
HBV-LC	377.4
HBV-LC	410.41
HBV-LC	457.62
HBV-LC	798.39
HBV-LC	466.67
HBV-LC	725.84
HBV-LC	470.98
HBV-LC	450.94
HBV-LC	504.11
HBV-LC	427.84
CHB	199.04
CHB	223.1
CHB	243.81
CHB	136.71
CHB	94.81
CHB	239.54
CHB	246.82
CHB	302.29
CHB	347.9
CHB	273.4
CHB	283.96
CHB	476.2
CHB	286.06
CHB	265.85
CHB	273.19
CHB	181.97
CHB	234.44
CHB	202.12
CHB	316.21
CHB	211.49
CHB	328.67
CHB	426.46
CHB	199.88
CHB	617.02
CHB	246.68
CHB	187.43
CHB	302.99
CHB	157.63
CHB	134.33
CHB	131.04
CHB	179.8
CHB	281.03
CHB	141.96
CHB	316.56
CHB	325.52
CHB	564.83
CHB	150.56
CHB	211.49
CHB	233.25
CHB	146.29
CHB	210.86
CHB	243.25
CHB	240.45
CHB	255.07
CHB	208.13
CHB	244.65
CHB	386.59
CHB	132.65
CHB	312.3
CHB	274.66
CHB	183.65
CHB	130.27
CHB	192.53
CHB	191.48
CHB	148.53
CHB	318.74
CHB	824.58
CHB	582.11
CHB	252.97
CHB	141.4
CHB	283.89
CHB	179.59
CHB	266.48
CHB	188.55
CHB	192.74
CHB	249.41
CHB	168.68
CHB	271.51
CHB	304.32
CHB	379.17
CHB	299.63
CHB	205.89
CHB	231.85
CHB	116.49
CHB	209.88
CHB	185.4
CHB	157.56
CHB	246.4
CHB	180.29
CHB	171.76
CHB	329.29
CHB	260.67
CHB	229.75
CHB	360.7
CHB	187.22
CHB	325.45
CHB	348.31
CHB	333.6
CHB	399.46
CHB	381.46
CHB	328.02
CHB	400.03
CHB	293.31
CHB	348.6
CHB	329.45
CHB	328.02
CHB	322.17
CHB	433.46
CHB	283.59
CHB	336.6
